# Supplementary material for: First-principles calculations of oxygen interstitials in corundum: a site symmetry approach
Source: Royal Society of Chemistry journal article supplement (doi:10.1039/c7cp04045h), 2017-01-01
Supplement: c7cp04045h1.pdf [file c7cp04045h1.pdf]

## Electronic Supplementary Information

### First-principles calculations of oxygen interstitials in corundum: site symmetry approach

Robert A. Evarestov,<sup>a\*</sup> Alexander Platonenko<sup>b</sup>, Denis Gryaznov<sup>b</sup>, Yuri F. Zhukovskii<sup>b</sup>, and Eugene A. Kotomin<sup>b,c</sup>

<sup>a</sup> Institute of Chemistry, St. Petersburg State University, Petrodvorets, Russia

<sup>b</sup> Institute of Solid State Physics, University of Latvia, Riga, Latvia

<sup>c</sup> Max Planck Institute for Solid State Research, Stuttgart, Germany

\* Corresponding author <r.evarestov@spbu.ru>

Our selected computational scheme very accurately reproduces the bulk properties of perfect corundum being used further in the calculations on oxygen interstitial atom behaviour therein performed using LCAO-DFT (B3PW) code CRYSTAL14.<sup>1</sup>

Table S/1 A comparison of calculated bulk properties of pure corundum crystal with the experiments. Phonon symmetry is given in parenthesis.

| Properties                                     | Expt.                                        | LCAO-B3PW-CRYSTAL14                                                                                  |
|------------------------------------------------|----------------------------------------------|------------------------------------------------------------------------------------------------------|
| Cell parameter, Å                              | $a = 4.759$ ,<br>$c = 12.991^a$ (ref. 47)    | $a = 4.761$ ,<br>$c = 12.996$                                                                        |
| Band Gap, eV                                   | 9.3 <sup>b</sup> , 8.8 <sup>c</sup>          | 8.72                                                                                                 |
| Bulk modulus, GPa                              | 253.7 <sup>d</sup>                           | 250.9                                                                                                |
| $c_{44}$ , GPa                                 | 146.8 <sup>d</sup>                           | 156                                                                                                  |
| Infra-red active frequencies, cm <sup>-1</sup> | 385, 400, 442, 569,<br>583, 635 <sup>e</sup> | 397 ( $e_u$ ), 409 ( $a_{2u}$ ),<br>451 ( $e_u$ ), 587 ( $e_u$ ),<br>592 ( $a_{2u}$ ), 648 ( $e_u$ ) |

<sup>a</sup> Ref. 2 <sup>b</sup> Ref. 3 <sup>c</sup> Ref. 4 <sup>d</sup> Ref. 5 <sup>e</sup> Ref. 6

Atomic configurations corresponding to Tables 1 and 2 of the main text are given below in Figures S/1,2

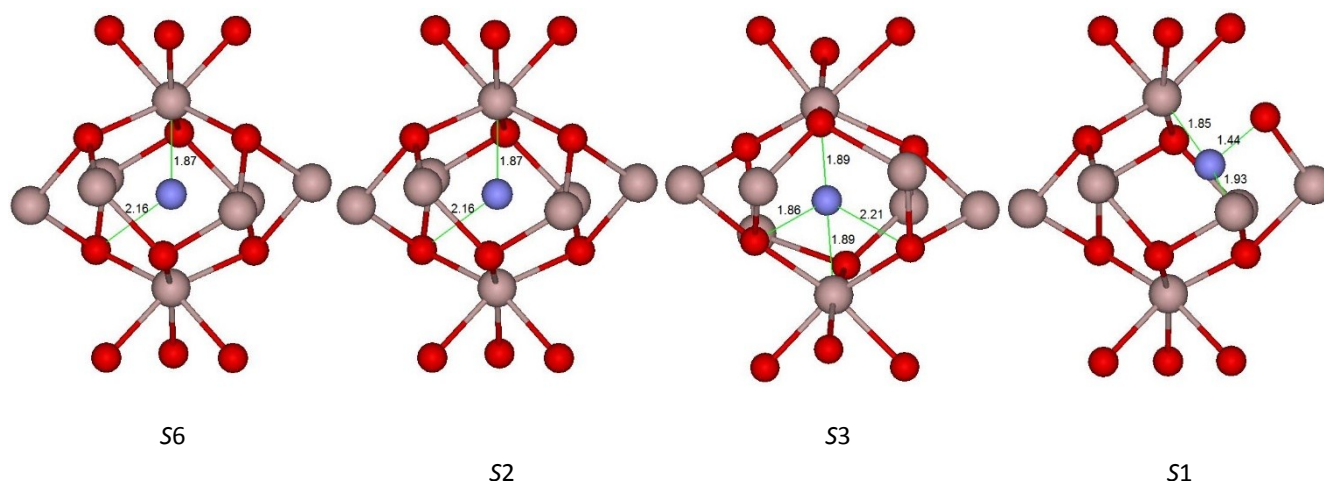

Figure S/1. Configurations of oxygen interstitials in different site symmetries in singlet state. Distances are given in Å.

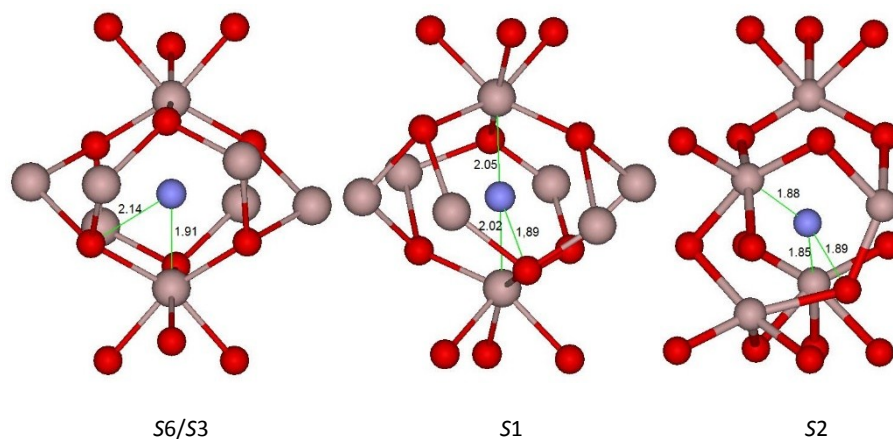

Figure S12. Configurations of oxygen interstitials in different site symmetries in triplet state. Distances are given in Å

### References

1. R. Dovesi, V.R. Saunders, C. Roetti, R. Orlando, C.M. Zicovich-Wilson, F. Pascale, B. Civalleri, K. Doll, N.M. Harrison, I.J. Bush, Ph. D'Arco, M. Llunell, M. Causà, and Y. Noël, CRYSTAL14 User's Manual (University of Torino, 2014).
2. V.G. Tsirelson, M.Y. Antipin, R.G. Gerr, R.P. Ozerov, and Y.T. Struchkov, *Phys. Status Sol. A*, 1985, **87**, 425-433.
3. F. Mota, C.J. Ortiz, R. Vila, N. Casal, A. Garcia, and A. Ibarra, *J. Nucl. Mater.*, 2013, **442**, Suppl. I, S699-S704.
4. R. H. French, *J. Am. Ceram. Soc.*, 1990, **73**, 477.
5. T. Goto and O.L. Anderson, *J. Geophys. Res.*, 1989, **94**, 7588–7602.
6. S.W. Kieffer, *Rev. Geophys. Space Phys.*, 1979, **17**, 20-32.
